# Supplementary material
Source: PubMed Central journal article supplement (PMC4213141)
Supplement: NIHMS60285-supplement-2.pdf [file NIHMS60285-supplement-2.pdf]

| Fly strains                                        | Description                                                                                                                  | Figures                                                    | Color |
|----------------------------------------------------|------------------------------------------------------------------------------------------------------------------------------|------------------------------------------------------------|-------|
| Wild-type                                          | Canton-S                                                                                                                     | 1f, 1g, 2a, 2b, S2, S3                                     |       |
| <i>ppk28</i>                                       | Loss-of-function mutant of the osmosensitive ion channel required for water taste                                            | 1f, 1g, S2                                                 |       |
| <i>Tbh<sup>m18</sup></i>                           | Tyramine $\beta$ hydroxylase mutant that cannot synthesize octopamine.                                                       | 2a                                                         |       |
| <i>dumb<sup>1</sup></i>                            | Loss-of-function allele of dopamine receptor DopR1                                                                           | 2b, S3                                                     |       |
| UAS-DopR1; <i>dumb<sup>2</sup></i>                 | Loss-of-function allele in dopamine receptor DopR1                                                                           | 2b, S3                                                     |       |
| UAS- <i>DopR1</i> /NP1131; <i>dumb<sup>2</sup></i> | Rescue DopR1 in MB $\gamma$ and subset of $\alpha'\beta'$ neurons in <i>dumb<sup>2</sup></i> background                      | 2b, S3                                                     |       |
| UAS- <i>DopR1</i> /c739; <i>dumb<sup>2</sup></i>   | Rescue DopR1 in MB $\alpha\beta$ neurons in <i>dumb<sup>2</sup></i> background                                               | 2b, S3                                                     |       |
| UAS- <i>DopR1</i> /c305a; <i>dumb<sup>2</sup></i>  | Rescue DopR1 in MB $\alpha'\beta'$ neurons in <i>dumb<sup>2</sup></i> background                                             | 2b, S3                                                     |       |
| UAS- <i>DopR1</i> /201Y; <i>dumb<sup>2</sup></i>   | Rescue DopR1 in MB $\gamma$ and $\alpha\beta$ -core neurons in <i>dumb<sup>2</sup></i> background                            | 2b, S3                                                     |       |
| UAS- <i>shi<sup>ts1</sup></i>                      | A temperature-sensitive dominant-negative dynamin transgene under UAS control                                                | 2a, 2c-e, 3a, 3d, 3k-m, 3o, 4b-e, 4f, S4, S5l-n, S6a-b, S7 |       |
| UAS- <i>shi<sup>ts1</sup></i> (JFRC100)            | A temperature-sensitive dominant-negative dynamin transgene under UAS-control                                                | 3d, 4c, S5a, S5b, S5c, S6c, S6e                            |       |
| lexAop- <i>shi<sup>ts1</sup></i> ; UAS-LexAi       | A temperature-sensitive dominant-negative dynamin transgene under LexAop-control and a LexA RNAi transgene under UAS control | 3k, 4e, S5g, S5h, S5i, S6d, S6f                            |       |
| Tdc2-GAL4                                          | Labels most octopaminergic/tyraminerpic neurons                                                                              | 2a                                                         |       |
| 0273-GAL4                                          | Labels entire PAM cluster of dopaminergic neurons and some MB output neurons                                                 | 2c, 2e, S4a, S4b, S4c, S8                                  |       |
| R58E02-GAL4                                        | Labels ~90 dopaminergic neurons in PAM cluster                                                                               | 2c, 2e, S4a, S4c, S8<br>S4b                                |       |
| <i>TH</i> -GAL4                                    | Labels all 12 dopaminergic neurons in PPL1 cluster and a few neurons in PAM cluster                                          | 2d                                                         |       |
| 0279-GAL4                                          | Labels PAM dopaminergic neurons innervating $\beta$ 1 and $\beta$ 2 zones                                                    | 3a                                                         |       |
| NP2583-GAL4                                        | Labels PAM dopaminergic neurons innervating $\beta$ 1 and $\alpha$ 1 zones                                                   | 3a                                                         |       |

|                                                 |                                                                                                    |                                                     |  |
|-------------------------------------------------|----------------------------------------------------------------------------------------------------|-----------------------------------------------------|--|
| R77E12-GAL4                                     | Labels PAM dopaminergic neurons innervating $\gamma$ 5, $\beta$ 1 and $\beta$ '2a zones            | 3a                                                  |  |
| R87D06-GAL4                                     | Labels PAM dopaminergic neurons innervating $\alpha$ 1 zones                                       | 3a                                                  |  |
| R15A04-GAL4                                     | Labels PAM dopaminergic neurons innervating $\gamma$ 5, $\beta$ 2, $\beta$ '1, $\alpha$ 1 zones    | 3a                                                  |  |
| R48B04-GAL4                                     | Labels PAM dopaminergic neurons innervating $\gamma$ 5, $\gamma$ 4, and $\beta$ '2 zones           | 3a, 3d, 4b-c, S5a-c, S6a-d, S7, S8                  |  |
| 0104-GAL4                                       | Labels PAM dopaminergic neurons innervating $\gamma$ 5, $\gamma$ 4, $\beta$ '2 and $\beta$ 2 zones | 3a, 4d, 4f, S6a, S6b                                |  |
| R48B04-LexA; 0104-GAL4                          | LexA expressed in R48B04 neurons and GAL4 expressed in 0104 neurons                                | 3k, 3l, 3m, S5g, S5h, S5i, S5j, S5k<br>4e, S6e, S6f |  |
| R15A04-GAL80; R48B04-GAL4                       | Labels PAM dopaminergic neurons innervating $\gamma$ 4, and $\beta$ '2 zones                       | 3o, S5l, S5m, S5n                                   |  |
| R48B04-LexA                                     | Labels PAM dopaminergic neurons innervating $\gamma$ 5, $\gamma$ 4, and $\beta$ '2 zones           | 4e, S6e, S6f                                        |  |
| Tdc2-GAL4; UAS- <i>shi</i> <sup>ts1</sup>       | Block Tdc2-GAL4 labeled neurons in a temperature-dependent manner                                  | 2a                                                  |  |
| 0273-GAL4; UAS- <i>shi</i> <sup>ts1</sup>       | Block 0273-GAL4 labeled neurons in a temperature-dependent manner                                  | 2c, 2e, S4a, S4b, S4c                               |  |
| R58E02-GAL4; UAS- <i>shi</i> <sup>ts1</sup>     | Block R58E02-GAL4 labeled neurons in a temperature-dependent manner                                | 2c, 2e, S4a, S4b, S4c                               |  |
| <i>TH</i> -GAL4; UAS- <i>shi</i> <sup>ts1</sup> | Block <i>TH</i> -GAL4 labeled neurons in a temperature-dependent manner                            | 2d                                                  |  |
| 0279-GAL4; UAS- <i>shi</i> <sup>ts1</sup>       | Block 0279-GAL4 labeled neurons in a temperature-dependent manner                                  | 3a                                                  |  |
| NP2583-GAL4; UAS- <i>shi</i> <sup>ts1</sup>     | Block NP2583-GAL4 labeled neurons in a temperature-dependent manner                                | 3a                                                  |  |
| R77E12-GAL4; UAS- <i>shi</i> <sup>ts1</sup>     | Block R77E12-GAL4 labeled neurons in a temperature-dependent manner                                | 3a                                                  |  |
| R87D06-GAL4; UAS- <i>shi</i> <sup>ts1</sup>     | Block R87D06-GAL4 labeled neurons in a temperature-dependent manner                                | 3a                                                  |  |
| R15A04-GAL4; UAS- <i>shi</i> <sup>ts1</sup>     | Block R15A04-GAL4 labeled neurons in a temperature-dependent manner                                | 3a                                                  |  |

|                                                                     |                                                                                                                                        |                                 |         |
|---------------------------------------------------------------------|----------------------------------------------------------------------------------------------------------------------------------------|---------------------------------|---------|
| R48B04-GAL4 UAS- <i>shi</i> <sup>ts1</sup>                          | Block R48B04-GAL4 labeled neurons in a temperature-dependent manner                                                                    | 3a, 4b, S6a, S6b, S7, S8        | Red     |
| R48B04-GAL4 UAS- <i>shi</i> <sup>ts1</sup> (JFRC100)                | Block R48B04-GAL4 labeled neurons in a temperature-dependent manner                                                                    | 3d, 4c, S5a, S5b, S5c, S6c, S6d | Red     |
| 0104-GAL4; UAS- <i>shi</i> <sup>ts1</sup>                           | Block 0104-GAL4 labeled neurons in a temperature-dependent manner                                                                      | 3a, 4d, 4f, S6a, S6b            | Green   |
| lexAop- <i>shi</i> <sup>ts1</sup> /R48B04-LexA; UAS-LexAi/0104-GAL4 | Block PAM-γ4/5 dopaminergic neurons in a temperature-dependent manner                                                                  | 3k, 4e, S5g, S5h, S5i, S6e, S6f | Magenta |
| lexAop-dTrpA1/R48B04-LexA; UAS-LexAi/0104-GAL4                      | Activate PAM-γ4/5 dopaminergic neurons in a temperature-dependent manner                                                               | 3l, 3m, S5j, S5k                | Magenta |
| UAS- <i>shi</i> <sup>ts1(JFRC100)</sup> ; R48B04-GAL4/R58E02-GAL80  | R58E02-GAL80 suppresses R48B04-GAL4 activity in PAM cluster to test whether phenotype results from R4804 blocking dopaminergic neurons | 3d, 3c, S5c, S6c, S6d           | Blue    |
| R15A04-GAL80; R48B04-GAL4/UAS- <i>shi</i> <sup>ts1</sup>            | Block PAM-γ4 and β' dopaminergic neurons in a temperature-dependent manner                                                             | 3o, S5l, S5m, S5n               | Pink    |
| lexAop- <i>shi</i> <sup>ts1</sup> /R48B04-LexA; UAS-LexAi           | Block R48B04-LexA labeled dopaminergic neurons in a temperature-dependent manner                                                       | 4e, S6e, S6f                    | Yellow  |

**Supplementary table 1.**

**Fly strains and their corresponding colors used in the bar-graphs.**
